# Supplementary material
Source: PubMed Central journal article supplement (PMC7938770)
Supplement: NIHMS1581463-supplement-1.pdf [file NIHMS1581463-supplement-1.pdf]

Contents (this .pdf):

Figure S1: Related to Figure 2 and STAR Methods. Benchmarking, categorization, enrichment and evolutionary conservation of complexes.

Figure S2: Related to Figures 5 & 6. BrainMap identifies complexes with diverse functions; RBP complexes are affected in ALS models.

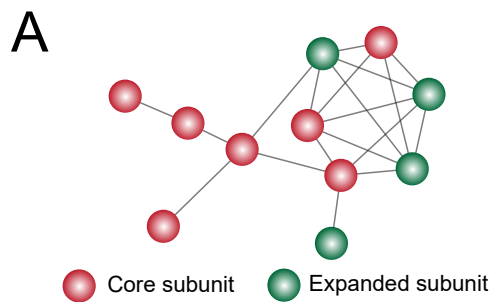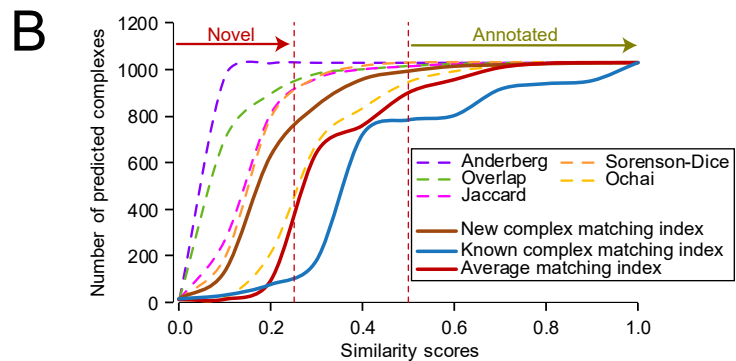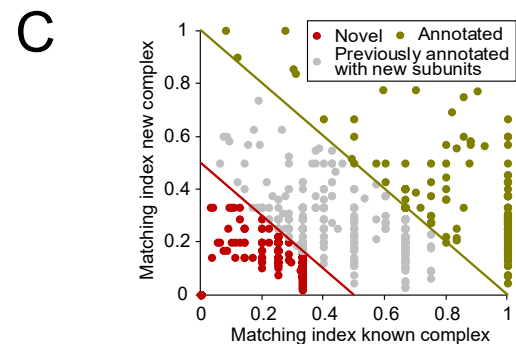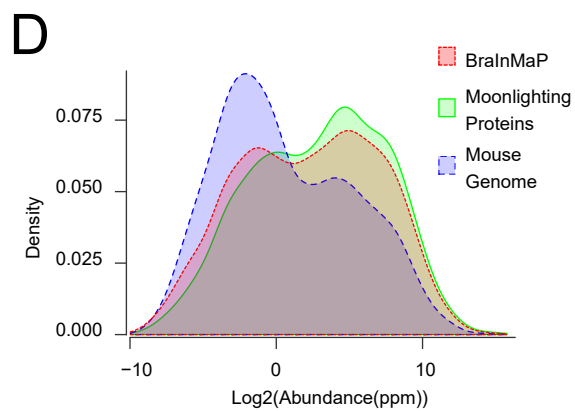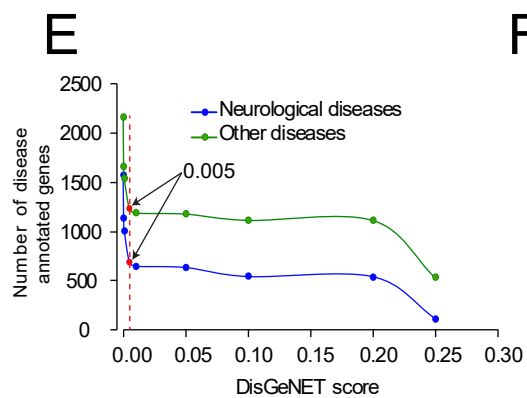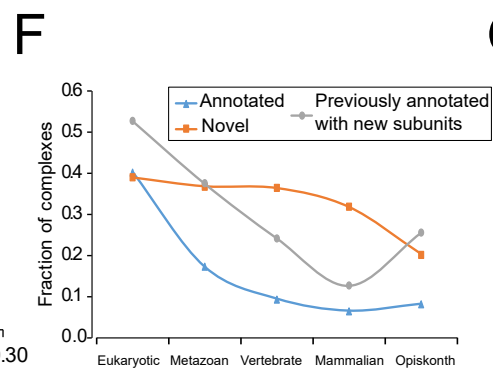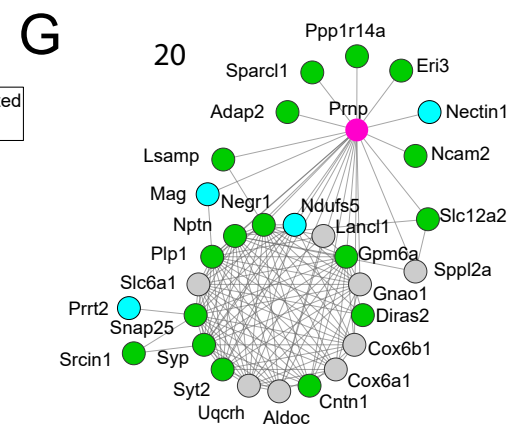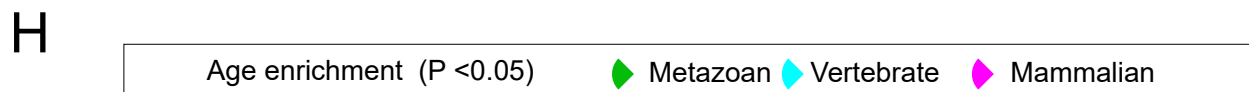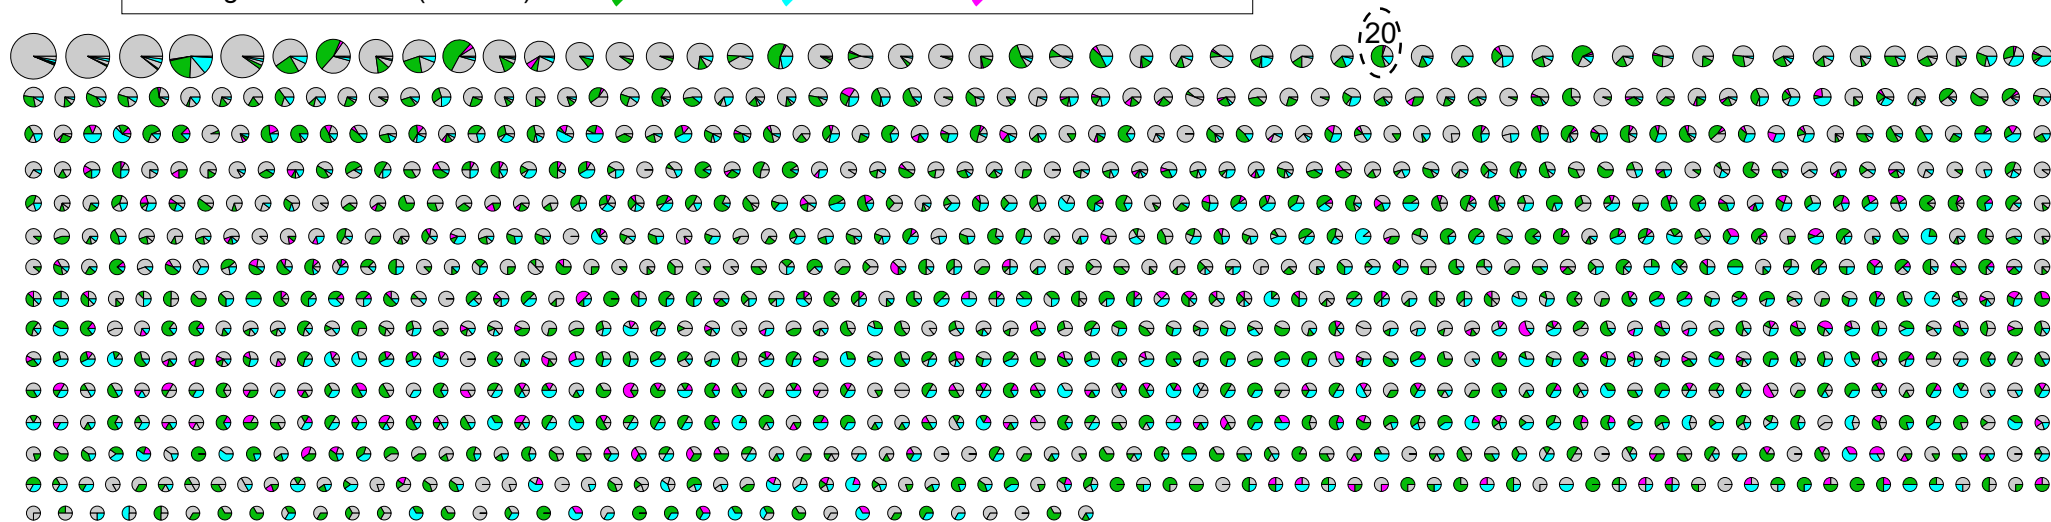

## FIGURE S1

- A** Deconstructed complex 'core' and 'expanded' components of the merged network.
- B** Distribution of six different similarity metrics used to establish the novelty of predicted assemblies.
- C** Scatterplot of average matching index for annotated, substantively annotated and novel complexes.
- D** Density distribution plot comparing the abundance of moonlighting proteins (subunits belonging to multiple complexes) in BrainMap, or the mouse genome.
- E** Distribution of disease associated genes in BrainMap complexes.
- F** Age distribution of BrainMap complexes.
- G** Exemplar Complex 20 showing the age of each subunit.
- H** Conservation and age of brain protein complexes, as determined by ortholog prediction (see STAR methods), colored according to the frequency of proteins in assigned 'age' categories according to phylogenetic origin: Eukaryotic (*grey*), Metazoan (*green*), Vertebrate (*blue*) or Mammalian (*cyan*).

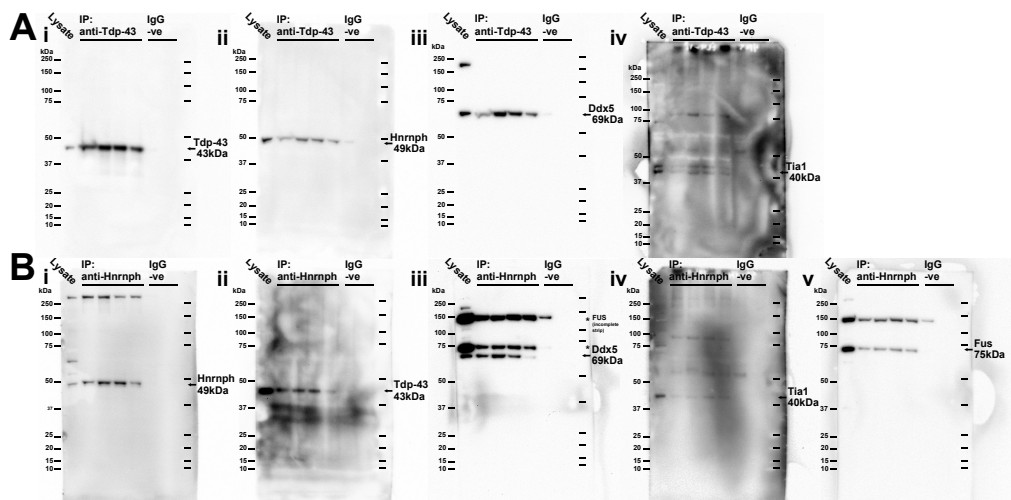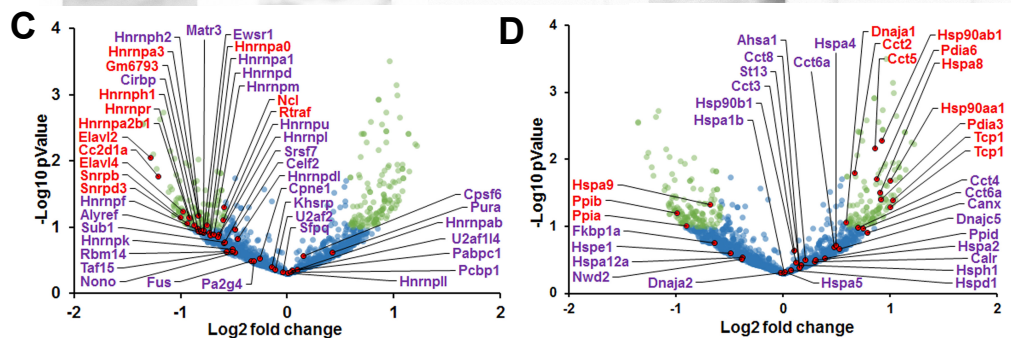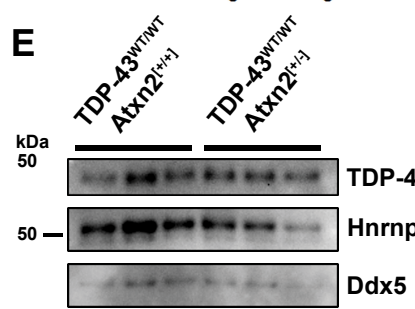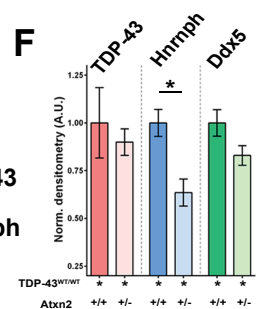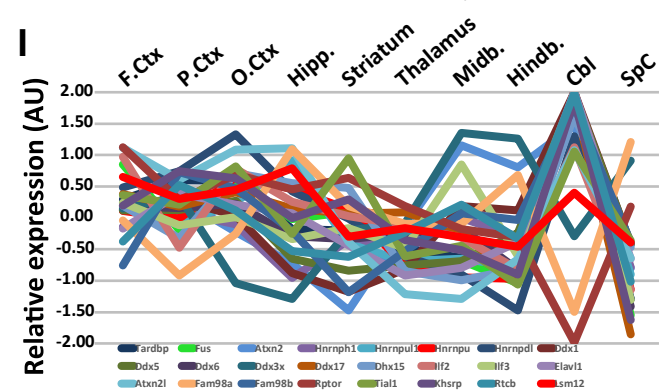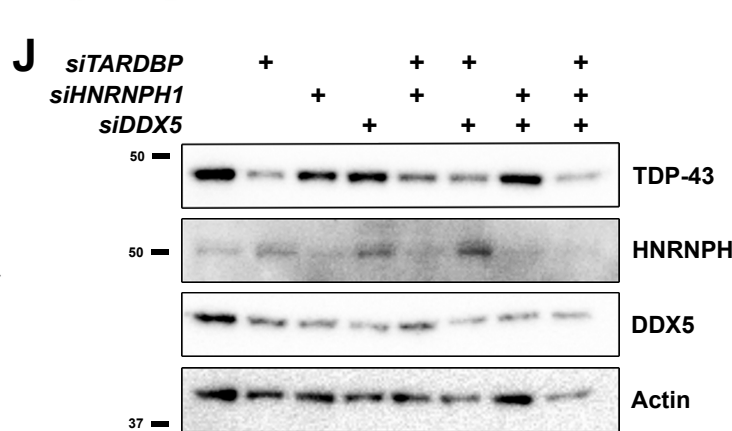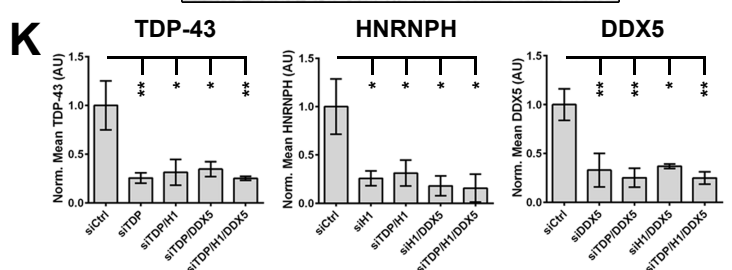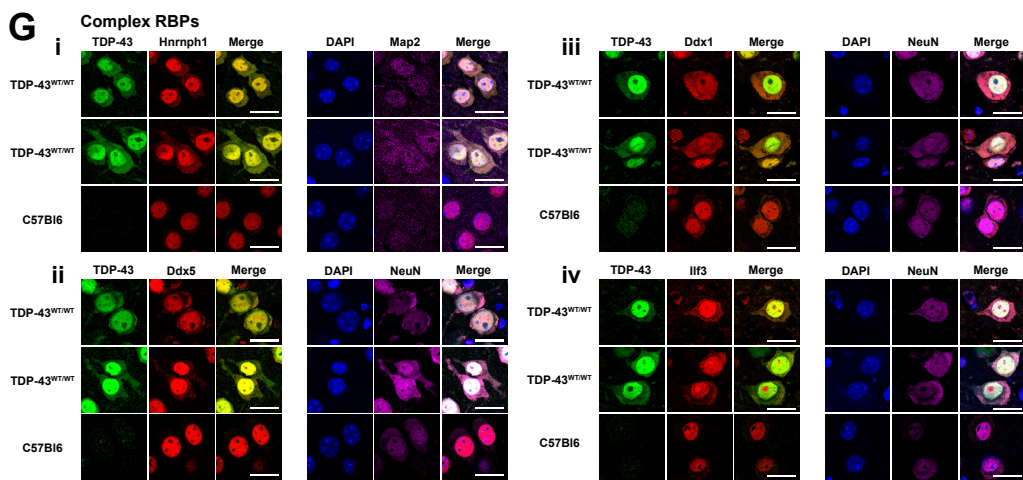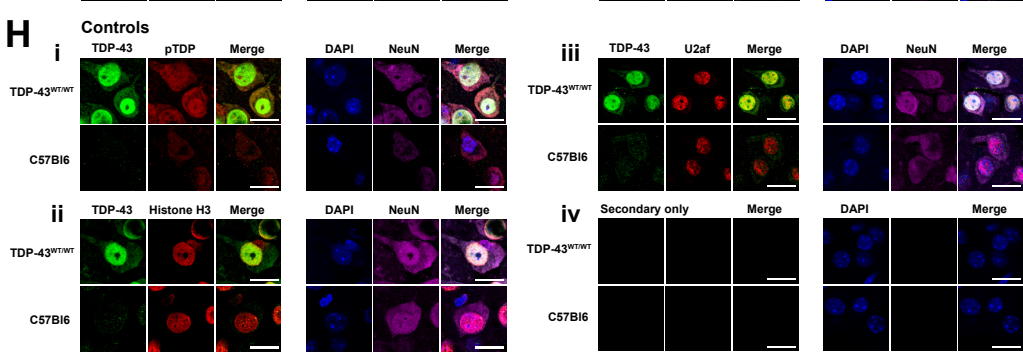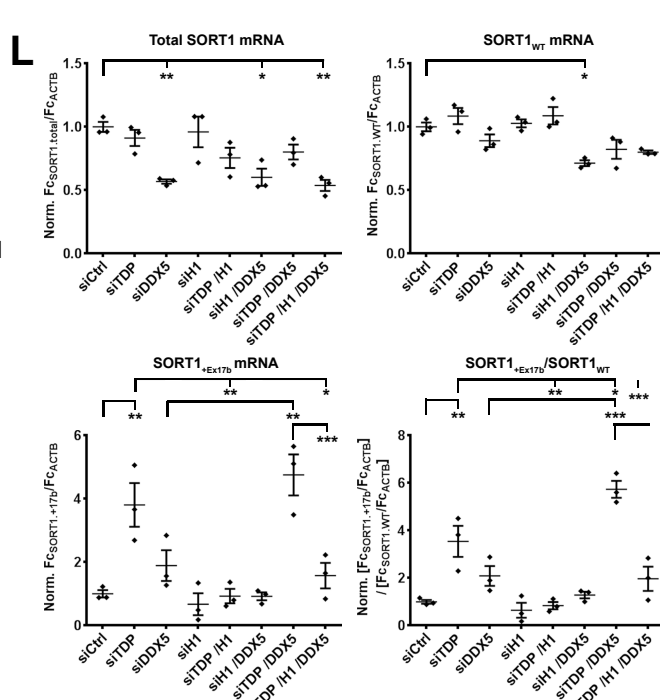



## FIGURE S2

- A** Immunoblots from immunoprecipitation of endogenous mouse Tdp-43. Relating to Figure 5D. Endogenous Tdp-43 was immunoprecipitated from the cortices of four wild type C57Bl/6J mice (MAB FL4 mouse anti-murine-Tdp-43), immunoblotted and probed for: A) TDP-43 (Proteintech; 12892-1-AP), B) hnRNP-H (Bethyl Labs; A300-511A), C) DDX5 (Abcam; ab21696), D) TIA1 (Santa Cruz; sc-1751). From these panels, cropped images were used to produce Figure 5D.
- B** Immunoblots from immunoprecipitation of endogenous mouse Hnrnp1. Relating to Figure 5E. Endogenous Hnrnp1 was immunoprecipitated from the cortices of four wild type C57Bl/6J mice (Bethyl Labs A300-511A, rabbit anti-hnRNP-H), immunoblotted and probed for: A) hnRNP-H (Santa Cruz; sc-10042), B) Tdp-43 (FL4, gift from Ling Shuo-Chien), C) DDX5 (Abcam; ab21696), D) TIA1 (Santa Cruz; sc-1751), E) FUS/TLS (Proteintech; 11570-1-AP). In panel iii, \* indicates bands from incomplete stripping of FUS antibodies. From these panels, cropped images were used to produce Figure 5E.
- C** In the protected TDP-43<sup>WT/WT</sup>Atxn2<sup>[+/-]</sup> mice, TDP-43 showed decreased interaction with proteins associated with RNA binding functional terms, this is exemplified by the volcano plot distribution of heterogeneous nuclear ribonucleoproteins (HNRNPs, each of which is labelled).
- D** Interestingly, TDP-43 in the protected TDP-43<sup>WT/WT</sup>Atxn2<sup>[+/-]</sup> mice showed increased interaction with proteins clustering to functional categories such as protein folding, ATP binding, and sodium/potassium ion homeostasis, this is exemplified by the volcano plot distribution of heat shock proteins and protein isomerases that form the unfolded protein response (each of which is labelled). For volcano plots, points plots Log<sub>2</sub> fold change against -Log<sub>10</sub> P value for each detected protein from TDP-IP of transgenic mice. A Log<sub>2</sub> fold change <0 indicates reduced interaction with TDP-43 in the protected TDP-43<sup>WT/WT</sup>Atxn2<sup>[+/-]</sup> versus TDP-43<sup>WT/WT</sup>Atxn2<sup>[+/+]</sup> mice. Green points indicate significant difference TDP-43<sup>WT/WT</sup>Atxn2<sup>[+/-]</sup> versus TDP-43<sup>WT/WT</sup>Atxn2<sup>[+/+]</sup> (Log<sub>2</sub> fold change > ±0.58 and -Log<sub>10</sub> P value >1.0). Red points are proteins of interest with red text for proteins showing significant difference and purple text for proteins showing no significant difference.
- E** Immunoblots of immunoprecipitated material from transgenic mice confirm the interaction of TDP-43 with Hnrnp1 and Ddx5.
- F** Densitometric analysis of RBP signal (from blot in panel B; normalized to TDP-43 signal) indicates that TDP-43 has 36% decreased interaction with Hnrnp1 (SEM ±0.07, \*P = 0.02) and a trend toward 17% decreased interaction with Ddx5 (SEM ±0.05, P = 0.11) in the protected TDP-43<sup>WT/WT</sup>Atxn2<sup>[+/-]</sup> mice versus the affected TDP-43<sup>WT/WT</sup> mice.

- G** In affected cortical neurons of transgenic TDP-43<sup>WT/WT</sup> mice, nuclear RBPs that form complexes with TDP-43 redistribute into cytoplasmic phospho-TDP-43 (pS409/410) inclusions. Relating to Figure 6C. The distribution of RNA binding proteins i) Hnrnp1, ii) Ddx5, iii) Ddx1, and iv) Ilf3, that are components of the BrainMap complex 22, were investigated in transgenic TDP-43<sup>WT/WT</sup> and wildtype C57Bl6 mice by confocal immunofluorescent imaging. The cytoplasmic distribution of the RBPs mirrored that of TDP-43; for instance, neurons showing focal accumulations of TDP-43 also showed colocalized accumulations of complex 22 RBPs. These RBPs are restricted to the nuclei of neurons and of non-neurons in wild type C57Bl6 mice. Neurons were immunolabelled either with the neuron specific markers Map2 or NeuN. Cell nuclei were counterstained with DAPI. Scale bar = 20µm.
- H** i) Cytoplasmic TDP-43 was phosphorylated at S409/410 using a phospho-specific antibody (a gift from Leonard Petrucelli). ii) The RNA binding protein U2af, which is not a component of RBP complex 11, does not redistribute out of neuronal nuclei in TDP-43<sup>WT/WT</sup> *Atn2*<sup>[+/+]</sup> mice, nor does the nuclear protein Histone H3 (iii). Secondary (donkey) anti-mouse-AF488, anti-rabbit-AF594 and anti-chicken-AF647 antibodies were found not to label the tissue indicating the specificity of the primary antibodies (iv).
- I** Regional protein expression of TDP-43 and associated components of ALS-relevant BrainMap complex 22. Protein expression was quantified in dissected brain regions by mass spectroscopy then normalized to whole brain expression. Individual protein components of the ALS-relevant RBP complex 22 are plotted against the brain region.
- J** Immunoblots from siRNA knock down in SH-SY5Y. Relating to Figure 6E, F. Cultured SH-SY5Y cells were transfected with siTDP-43, siHNRNP1 and siDDX5 for 72hrs before harvesting and immunoblotting siTDP-43 elicited a 65.5% to 74.8% knockdown of TDP-43 protein, siHNRNP1 elicited a 68.7% to 84.4% knockdown of HNRNP1 protein, siDDX5 elicited a 63.1% to 75.1% knockdown of DDX5 protein. Furthermore, these siRNA knockdown experiments confirm the specificity of the anti-hnRNP-H (Bethyl Labs; A300-511A) and anti-DDX5 (Abcam; ab21696) used for immunoblotting in **Figure 5D, E** (and **Figure S2A, B**) and for immunolabelling in **Figure 6C** (and **Figure S2G**).
- K** Graphs show mean ± SEM protein band densitometry. (N= 3 per treatment group, ANOVA w/ Dunnett's multiple comparison test against siCtrl group, \* P< 0.05, \*\* P< 0.01). For Fig 5G, RBPs were similarly knocked down in SH-SY5Y and RNA collected for splicing analysis.
- L** Total *SORT1* mRNA, *SORT1*<sub>WT</sub> mRNA and *SORT1*<sub>+Ex17b</sub> mRNA transcript was quantified, normalized to ACTB and to the mean of the siControl (siCtrl) treated group. The relative ratio of exon 17b inclusion

was calculated as  $SORT1_{+Ex17b}/SORT1_{WT}$ . Scatter plots show individual data points with bars at mean  $\pm$  SEM (N= 3 per treatment group, ANOVA w/ Tukey's multiple comparison test between all groups, \* P< 0.05, \*\* P< 0.01, \*\*\* P< 0.001).
